# Supplementary material for: A multifunctional Si3N4 nanobrick metasurface for sensing
Source: Royal Society of Chemistry journal article supplement (doi:10.1039/d4tc01992j), 2024-01-01
Supplement: d4tc01992j1.pdf [file d4tc01992j1.pdf]

## Supporting information

### Multifunctional Si<sub>3</sub>N<sub>4</sub> nanobrick metasurface for sensing

Huimin Wang<sup>a,1</sup>, Lu Wang<sup>a,1</sup>, Tao Wang<sup>a,\*</sup>, Ming Shen<sup>a</sup>, Xinzhao Yue<sup>a</sup>, Enze Lv<sup>a</sup>, Jinwei Zeng<sup>a</sup>,  
Xuewen Shu<sup>a,\*</sup>, and Jian Wang<sup>a,\*</sup>

<sup>a</sup> Wuhan National Laboratory for Optoelectronics, Huazhong University of Science and Technology, Wuhan, 430074, China.

<sup>1</sup> Huimin Wang and Lu Wang contributed equally to this work.

\* Corresponding author: Email: [wangtao@hust.edu.cn](mailto:wangtao@hust.edu.cn); [xshu@hust.edu.cn](mailto:xshu@hust.edu.cn); [jwang@hust.edu.cn](mailto:jwang@hust.edu.cn)

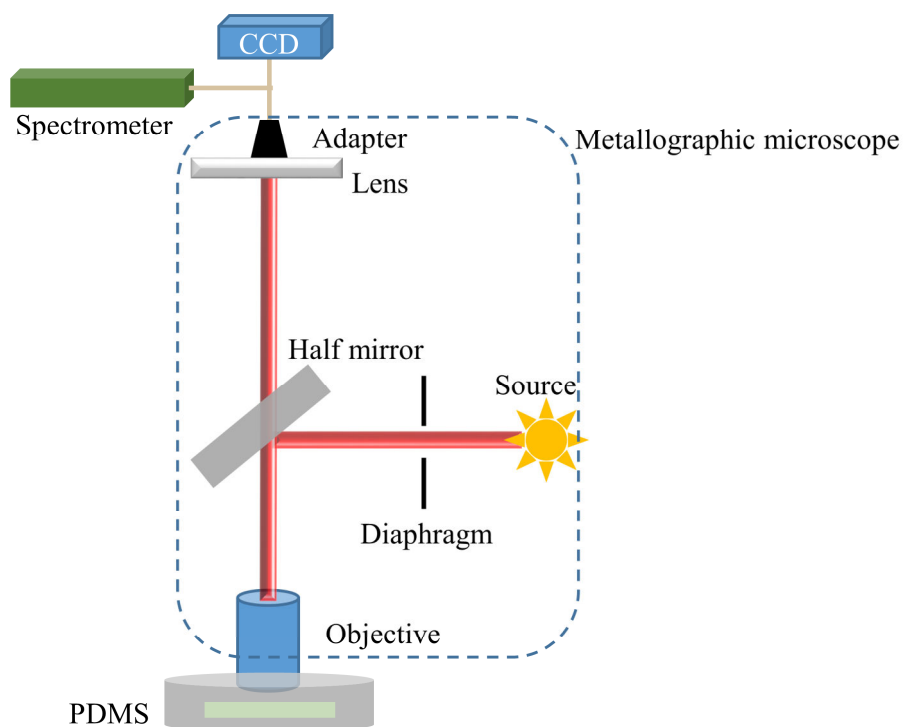

**Fig. S1** Schematic diagram of the experimental measurement setup. A 5× microscope objective lens is chosen for observing.

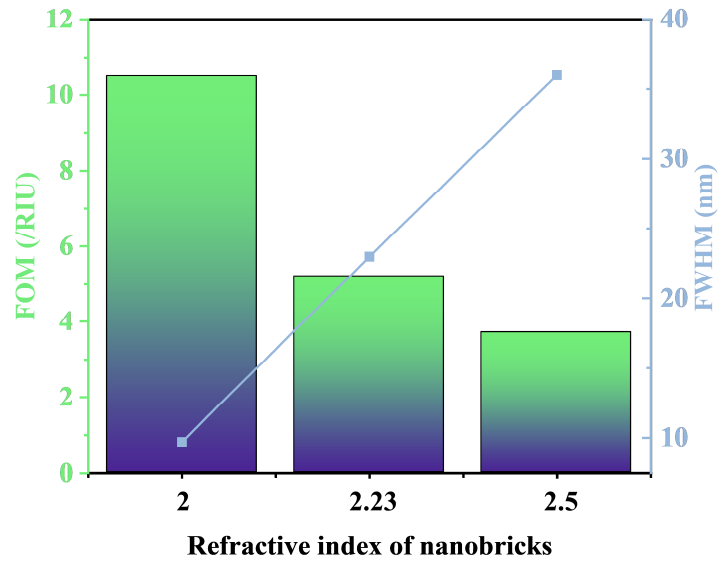

**Fig. S2** FOM and FWHM of dielectric metasurfaces with nanobricks with different refractive indices changing from  $n = 2$  to  $n = 2.5$ .  $P$  and  $H$  are 360 nm and 350 nm, respectively. The duty cycles ( $f$ ) of nanobricks with  $n = 2, 2.23,$  and  $2.5$  are 0.6, 0.52, and 0.45, respectively.

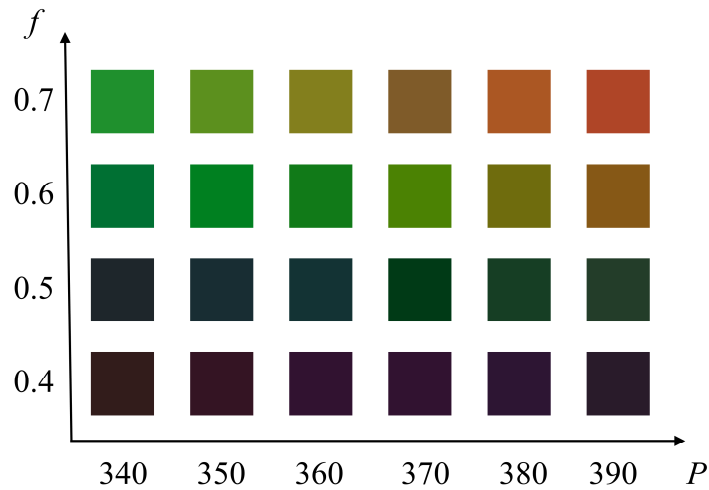

**Fig. S3** Reflected colors of  $\text{Si}_3\text{N}_4$  metasurfaces based on numerical simulations with different structural parameters. The simulated environment is air.

**Table S1** Results of the energy dispersive spectrometer.

|                                                 | Element               | C     | N     | Si    | O     | Total |
|-------------------------------------------------|-----------------------|-------|-------|-------|-------|-------|
| bare Si <sub>3</sub> N <sub>4</sub> metasurface | Weight percentage (%) | 0     | 58.10 | 30.30 | 11.61 | 100   |
| metasurface/silane-PEG-COOH                     | Weight percentage (%) | 23.49 | 10.09 | 47.96 | 18.46 | 100   |

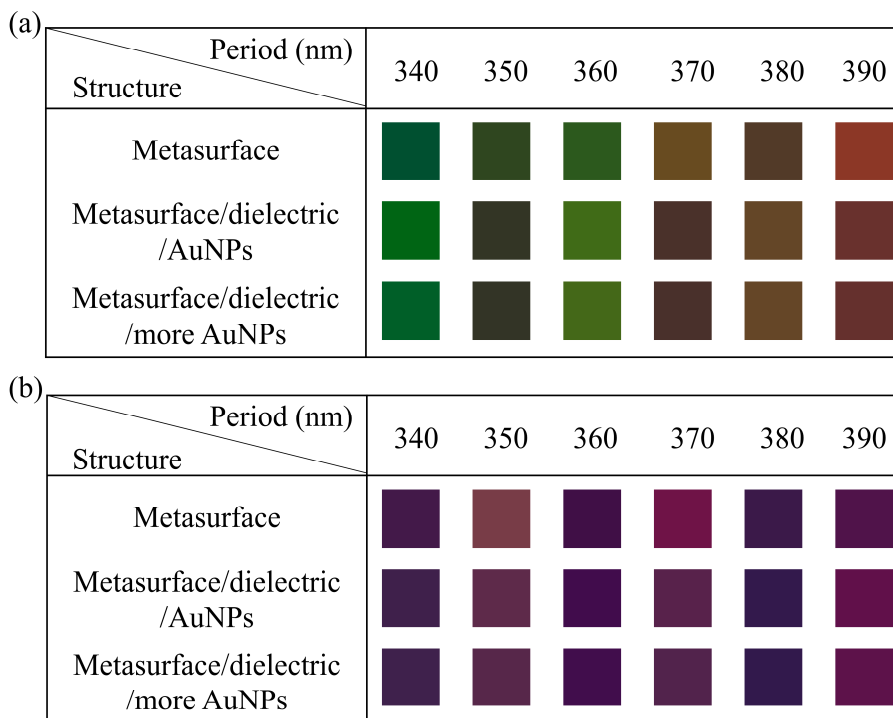

**Fig. S4** Colors corresponding to simulated reflection spectra for the Si<sub>3</sub>N<sub>4</sub> metasurface, metasurface/dielectric/AuNPs, and metasurface/dielectric/more AuNPs at the periods from 340 nm to 390 nm. The values of duty cycle ( $f$ ) are 0.6, and 0.8 in (a) and (b), respectively. The simulated environment is PBS.

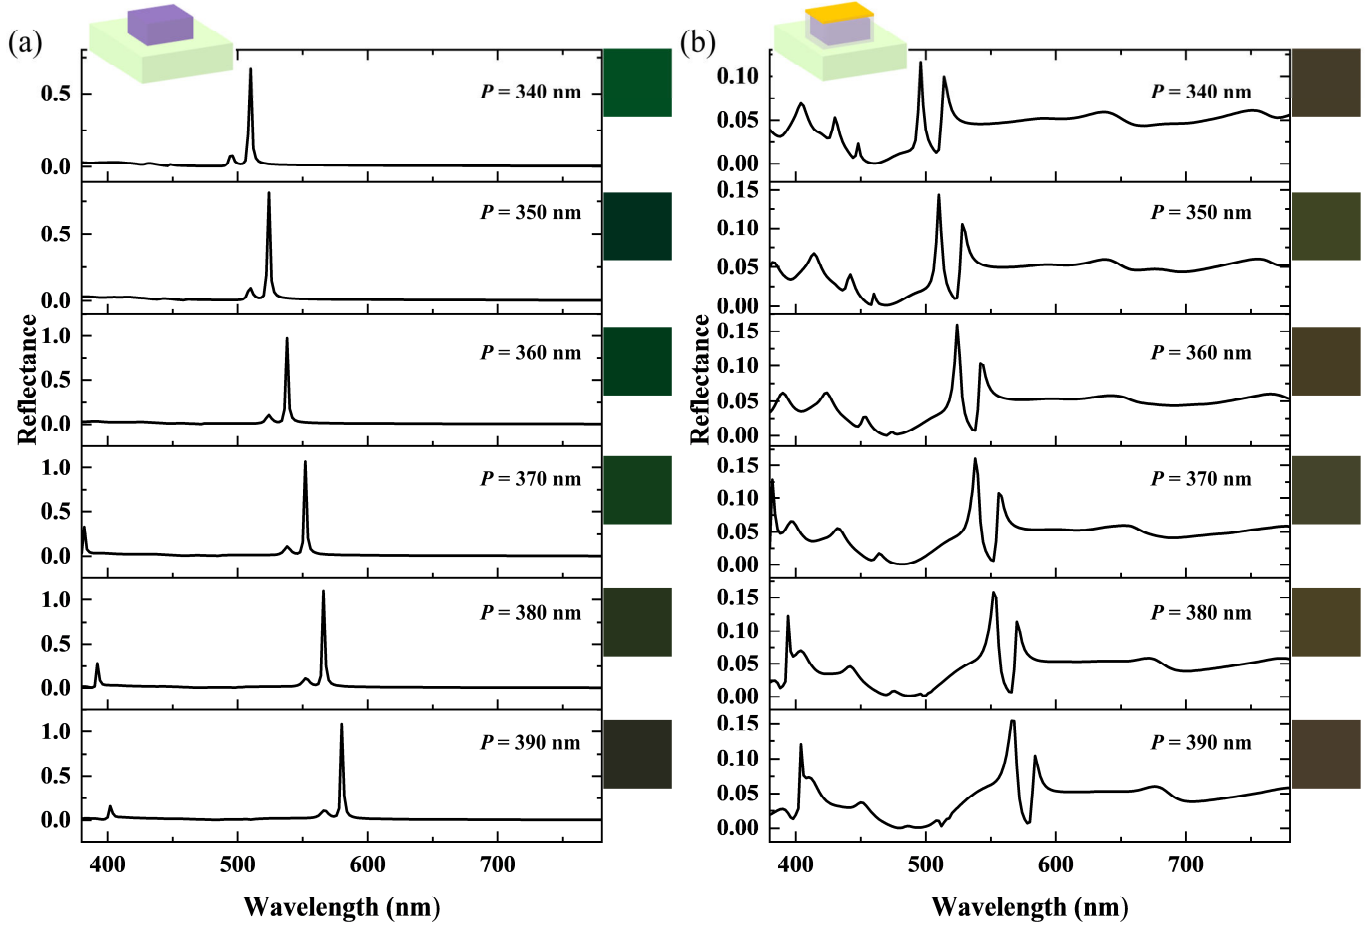

**Fig. S5** Reflection spectra with  $P$  from 340 nm to 390 nm and  $f = 0.5$  for  $\text{Si}_3\text{N}_4$  metasurface (a) and  $\text{Si}_3\text{N}_4/\text{dielectric}/\text{GF}$  (b). Insets are the colors corresponding to the reflection spectra. The simulated environment is PBS.

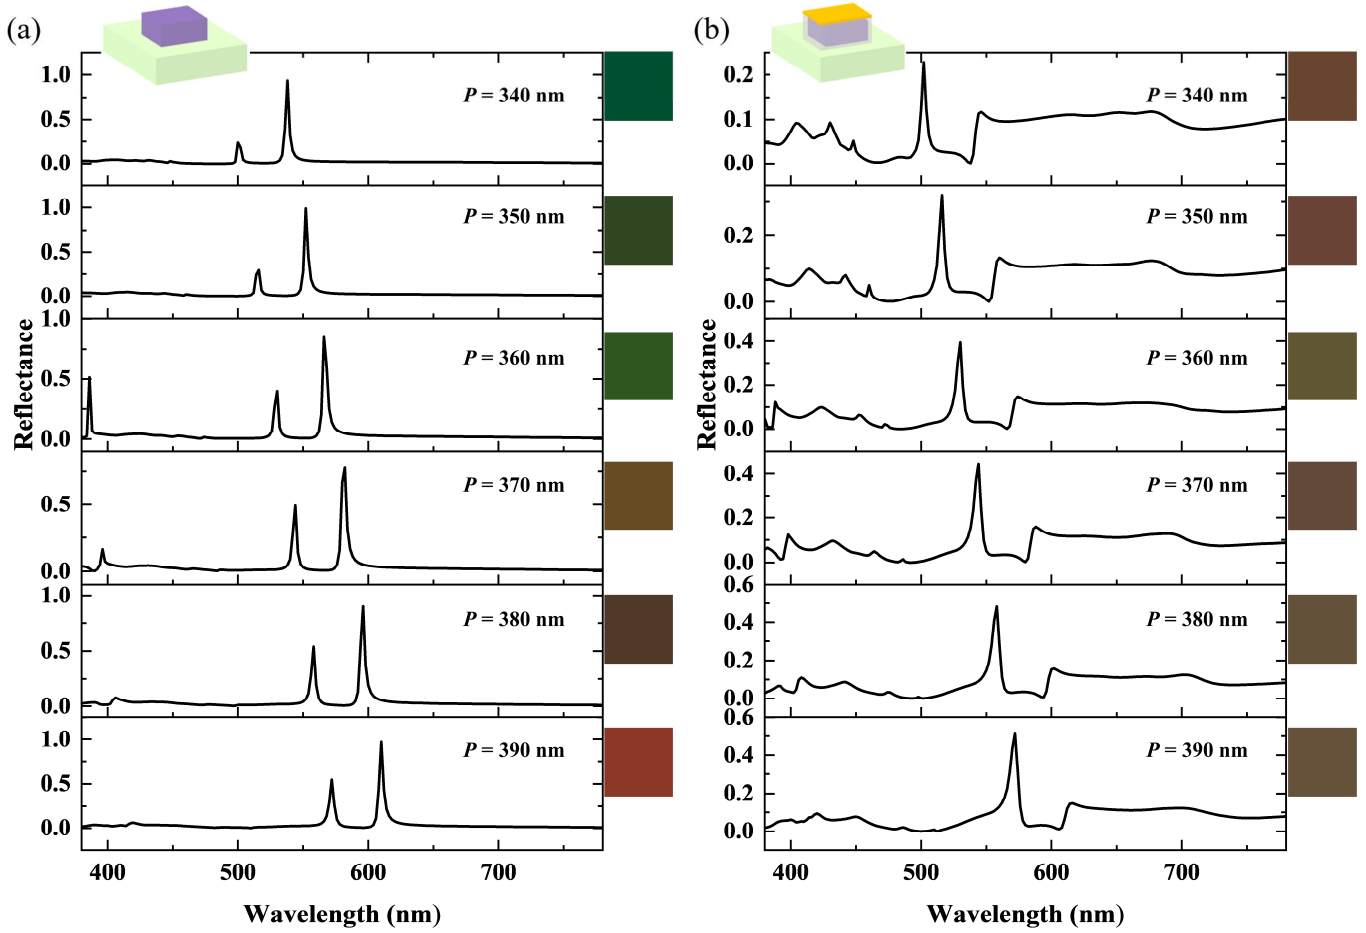

**Fig. S6** Reflection spectra with  $P$  from 340 nm to 390 nm and  $f = 0.6$  for  $\text{Si}_3\text{N}_4$  metasurface (a) and  $\text{Si}_3\text{N}_4/\text{dielectric}/\text{GF}$  (b). Insets are the colors corresponding to the reflection spectra. The simulated environment is PBS.

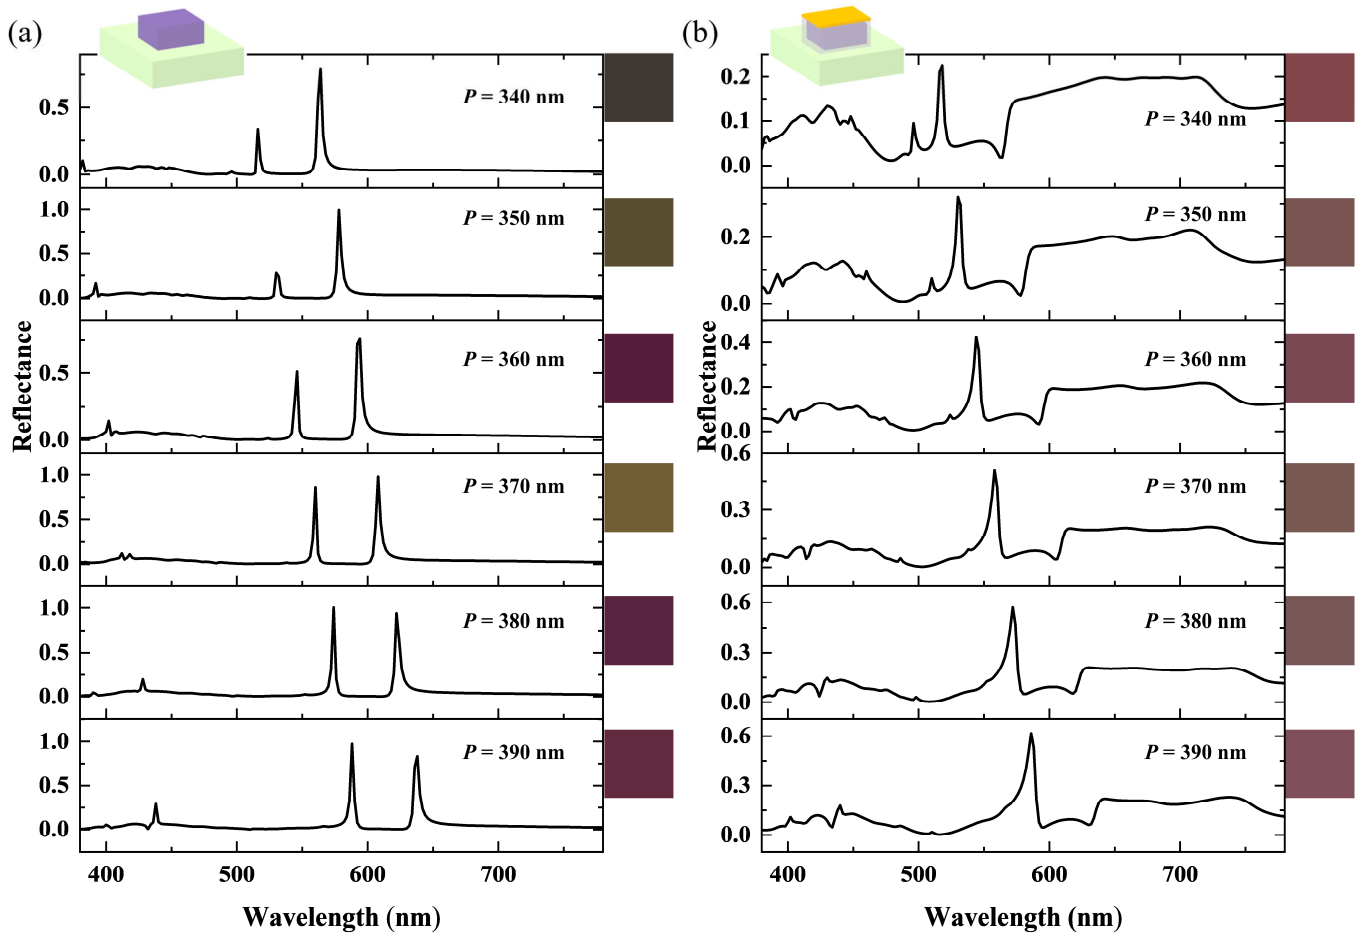

**Fig. S7** Reflection spectra with  $P$  from 340 nm to 390 nm and  $f = 0.7$  for  $\text{Si}_3\text{N}_4$  metasurface (a) and  $\text{Si}_3\text{N}_4/\text{dielectric}/\text{GF}$  (b). Insets are the colors corresponding to the reflection spectra. The simulated environment is PBS.
